# Supplementary material for: Perceptions of the Role of Living Alone in Providing Services to Patients With Cognitive Impairment
Source: PubMed Central journal article supplement (PMC10439475; doi:10.1001/jamanetworkopen.2023.29913), 2023-08-18
Supplement: jamanetwopen-e2329913-s001.pdf [file jamanetwopen-e2329913-s001.pdf]

## Data Sharing Statement

### Data

**Data available:** Yes

**Data types:** Deidentified participant data, Data (not involving human participants)

**How to access data:** Request for data must be sent to an individual, please email [elena.portacolone@ucsf.edu](mailto:elena.portacolone@ucsf.edu)

**When available:** beginning date: 01-01-2024

### Supporting Documents

**Document types:** Informed consent form

**How to access documents:** Request for data must be sent to an individual, please email [elena.portacolone@ucsf.edu](mailto:elena.portacolone@ucsf.edu)

**When available:** beginning date: 01-01-2024

### Additional Information

**Who can access the data:** researchers whose proposed use of the data has been approved

**Types of analyses:** To support better public policies and programs to support older adults

**Mechanisms of data availability:** Data will be available with a signed data access agreement
